# Supplementary material for: Chemical Synthesis and Characterization of an Equinatoxin II(1–85) Analogue
Source: MDPI journal article supplement (doi:10.3390/molecules22040559), 2017-03-30
Supplement: s1 [file s1]

*Supplementary data*  
*for*  
**Chemical Synthesis and Characterization of an  
Equinatoxin II (1-85) Analogue**

Contents

Figure S1. Solution  $^1\text{H}$  NMR in DPC micelles

pp 1-2.

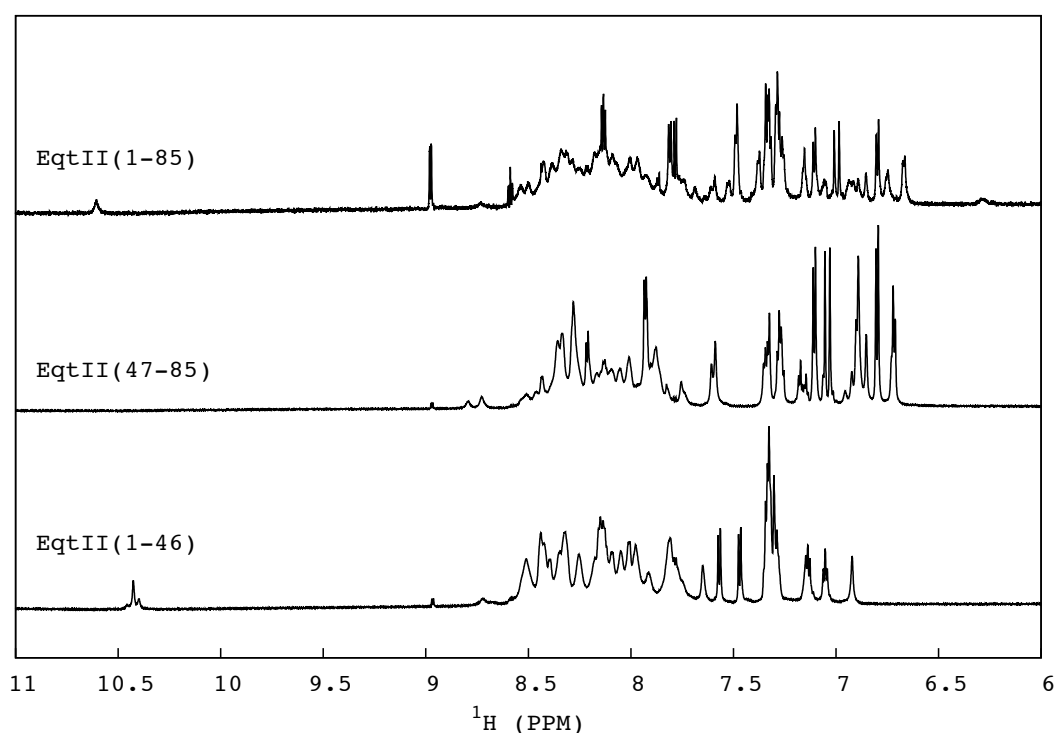

**Figure S1.**  $^1\text{H}$  solution NMR spectra of amide region of EqII(1-46) fragment (bottom), EqII(47-85) A47C fragment (middle), and EqII(1-85) fragment (top) in the presence of  $\text{d}_{38}$ -DPC micelles. NMR samples were prepared by dissolving the dry peptides in 50 mM perdeuterated DPC ( $\text{d}_{38}$ -DPC, 20 mM phosphate pH 7.4, 50 mM KCl, 0.05 mM 4,4-dimethyl-4-silapentane-1-sulfonic acid (DSS), 10%v  $\text{D}_2\text{O}$ ). The concentrations of EqII(1-46), EqII(47-85), EqII(1-85) and  $\text{d}_{38}$ -DPC were 1 mM, 1 mM, 0.05 mM and 50 mM, respectively.

$^1\text{H}$  1D NMR spectra were obtained at 298 K on an 800 MHz Bruker Advance II spectrometer equipped with a 5 mm TCI cryoprobe. Chemical shifts were referenced to DSS at 0 ppm. Data were processed in NMRPipe [1] and plotted using Gnuplot 4.6.

1. Delaglio, F., Grzesiek, S., Vuister, G. W., Zhu, G., Pfeifer, J., Bax, A. NMRPipe: a multidimensional spectral processing system based on UNIX pipes. *J. Biomol. NMR* **1995**, 6, 277–293.
